# Supplementary material
Source: Springer Nature journal article supplement (https://www.springermedizin.de/resource/supplementary/12916_2012_712_MOESM5_ESM.pdf/9598728)

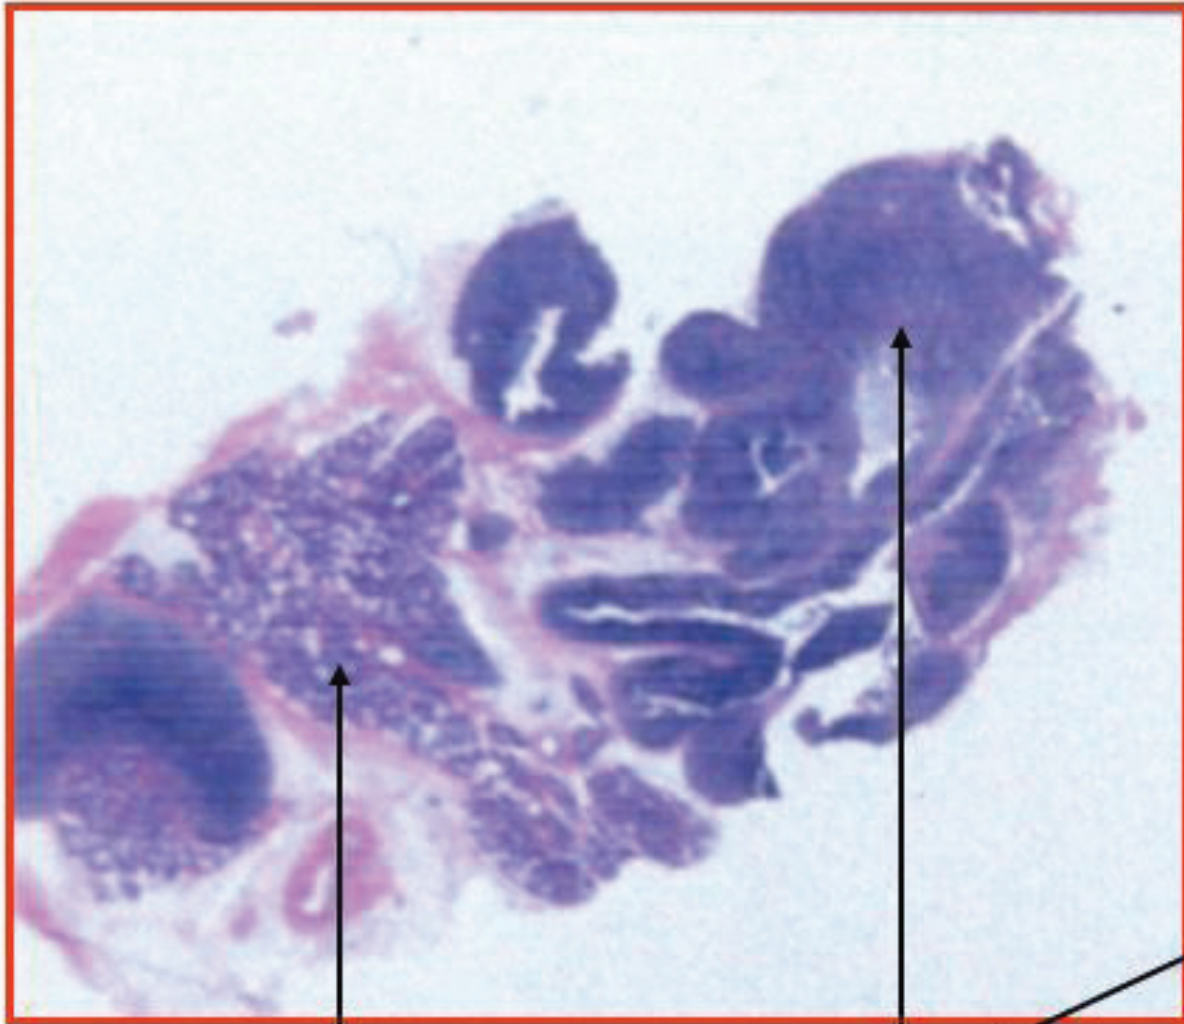

**Lymphoma-free  
parenchyma**

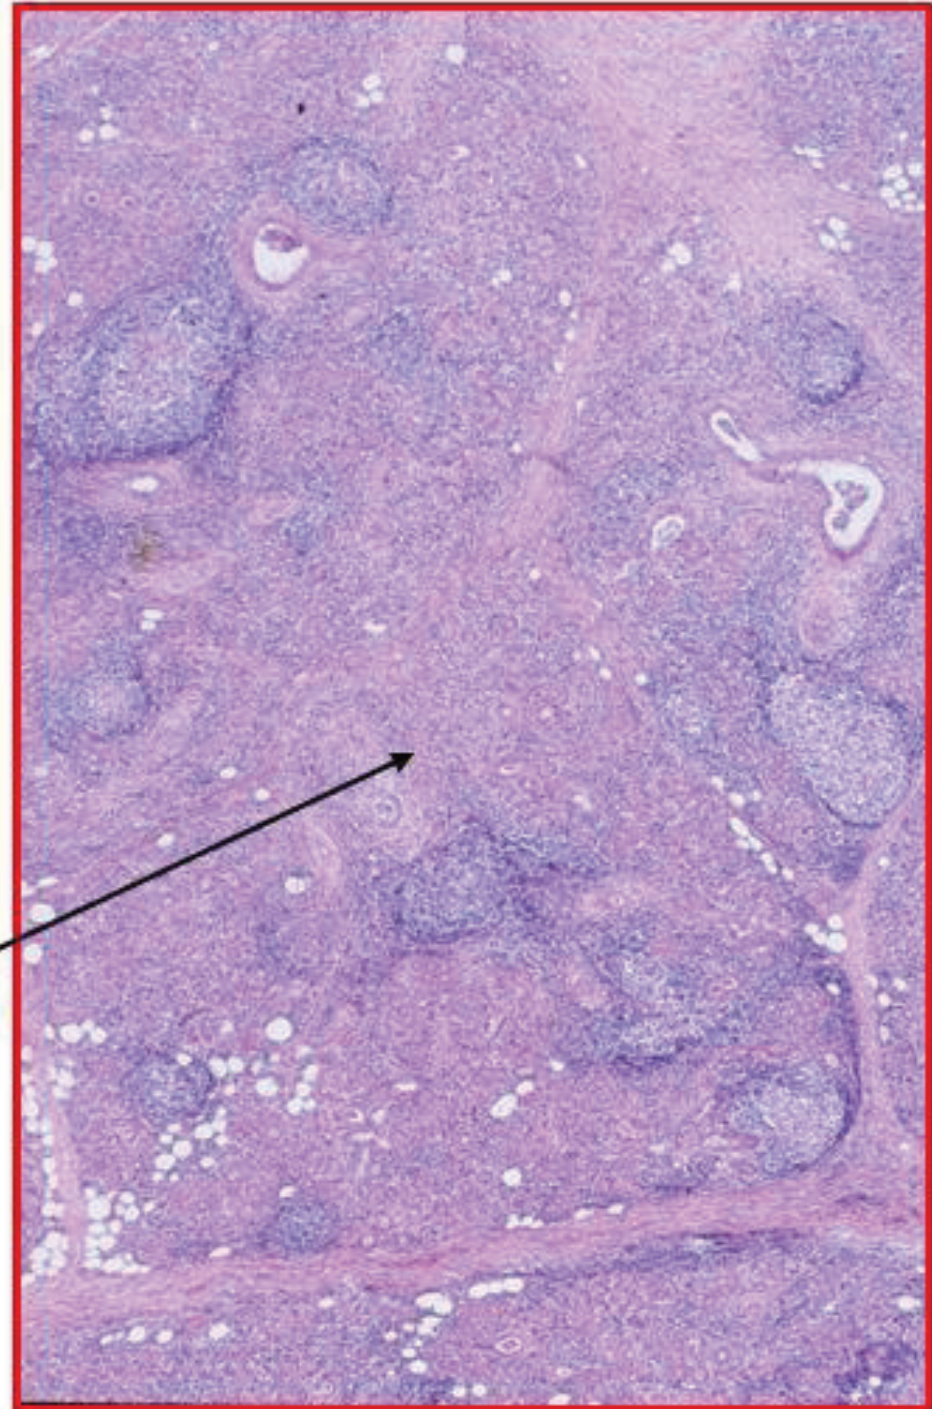

**Parenchyma  
infiltrated by  
lymphoma**

Supplement: MOESM5 [file 9598728]
